# Supplementary material
Source: Springer Nature journal article supplement (https://www.springermedizin.de/resource/supplementary/12955_2013_1254_MOESM2_ESM.pdf/9559188)
Supplement: MOESM2 [file 9559188]

a. Item generation and selection

Results of literature search for items considered to be TCM theory for item generation and selection.

b. Item reduction and pretesting

Recruitment of 45 participants for the item reduction, with a final 40 participants responding in the pretest.

c. Item presentation

A total of 17 items were presented. All items were answered on a four-point Likert-type scale except for three items that were patient-generated indexes of primary, secondary or new occurrences of bothersome symptoms.

d. Validation of the questionnaire

Among 188 participants from a clinical trial of atopic dermatitis, who also completed SCORAD.
